# Supplementary material
Source: Springer Nature journal article supplement (https://www.springermedizin.de/resource/supplementary/12875_2005_139_MOESM4_ESM.pdf/9436514)

**a) All survey respondents (n=88):**

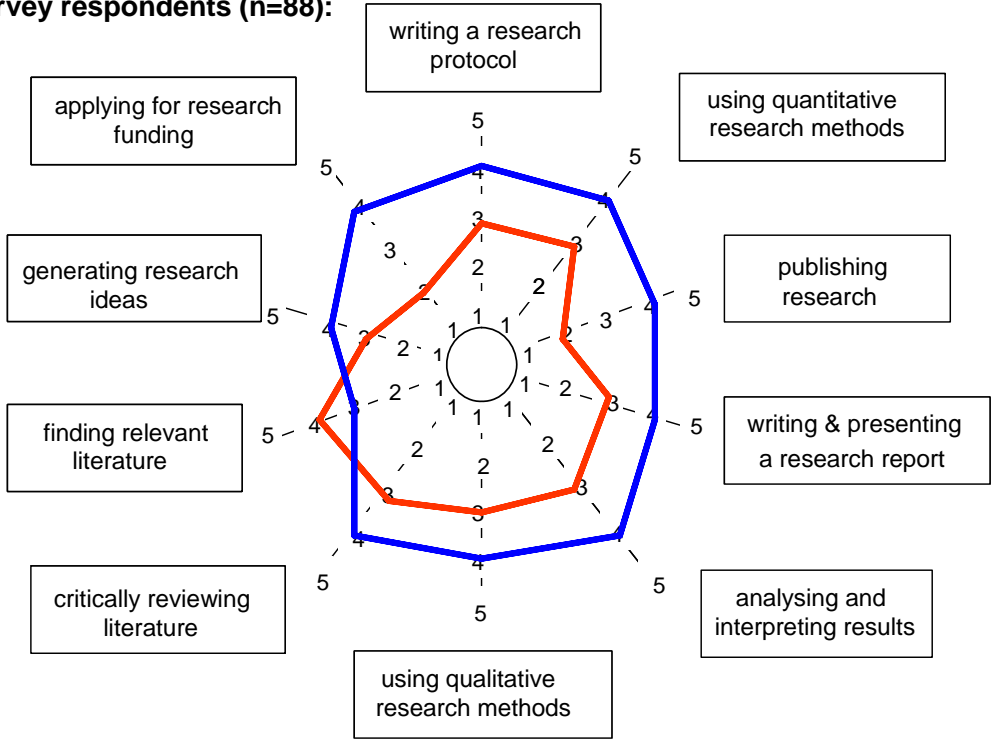

■ Research experience      1 = no experience / interest  
■ Interest in up-skilling      5 = very experienced / interested

**b) Non-participants (n=18):**

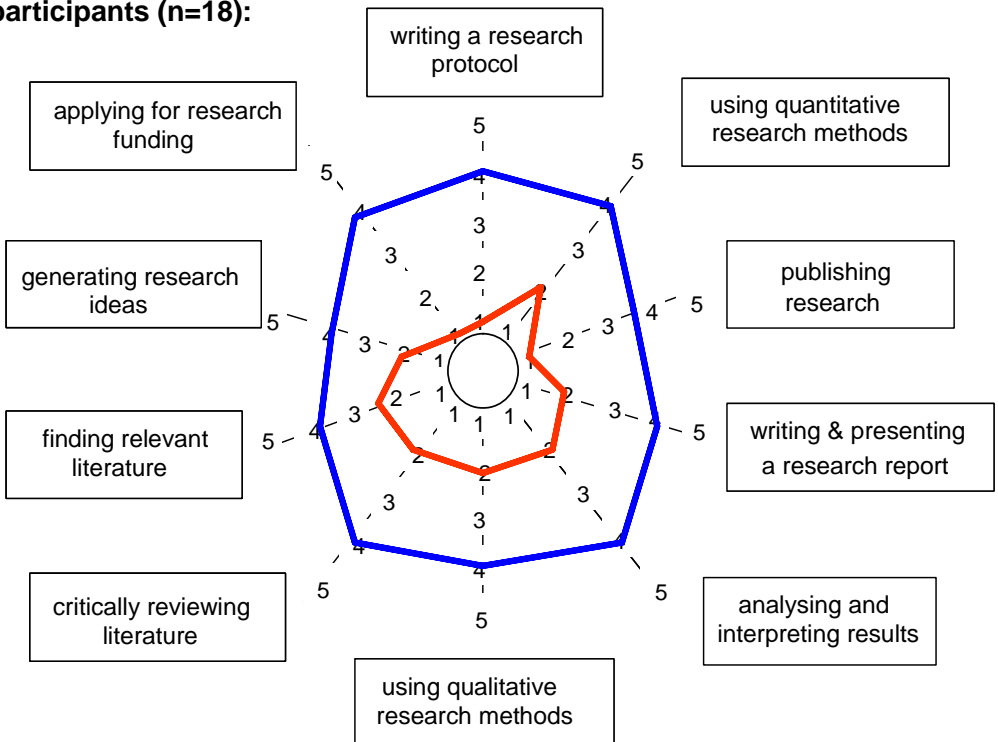

Supplement: MOESM4 [file 9436514]
